# Supplementary material
Source: PubMed Central journal article supplement (PMC1785140)

### A Translocations

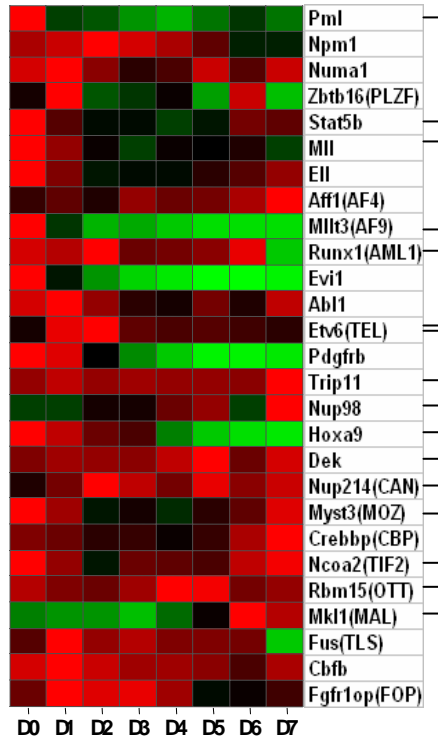

### B Gain-of-function mutations

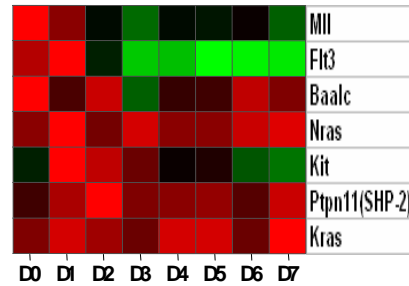

### C Loss-of-function mutations

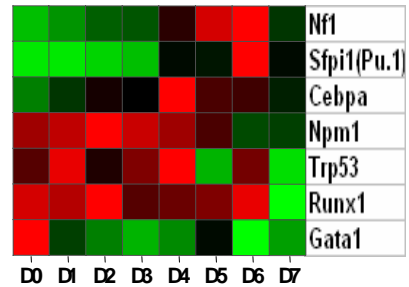

### D Altered by insertional mutagenesis

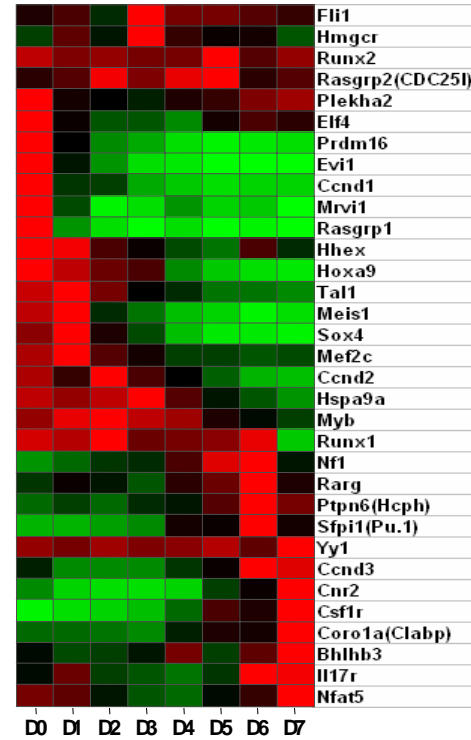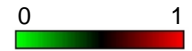

Supplement: blood_blood-2006-07-036640_4.pdf [file blood_blood-2006-07-036640_4.pdf]
